# Supplementary material for: Reactivation of Varicella-Zoster Virus in Patients with Lung Cancer Receiving Immune Checkpoint Inhibitors: Retrospective Nationwide Population-Based Cohort Study from South Korea
Source: MDPI journal article supplement (doi:10.3390/cancers16081499), 2024-04-14
Supplement: s1 [file s1]

**Supplemental Table S1.** 1:1 Propensity score matching between ICIs and non-ICIs groups using the age, sex, comorbidities, and concomitant use of immunosuppressive drugs.

|                                                          | Before matching   |                          |                 | After matching    |                       |                 |
|----------------------------------------------------------|-------------------|--------------------------|-----------------|-------------------|-----------------------|-----------------|
|                                                          | ICIs<br>(n = 897) | Non-ICIs<br>(n = 50,124) | <i>p</i> -value | ICIs<br>(n = 652) | Non-ICIs<br>(n = 652) | <i>p</i> -value |
| <b>Age (year), n (%)</b>                                 |                   |                          | 0.008           |                   |                       | 0.262           |
| < 40 (%)                                                 | 6 (0.7)           | 475 (0.9)                |                 | 6 (0.9)           | 10 (1.5)              |                 |
| 40–50 (%)                                                | 44 (4.9)          | 2,019 (4.0)              |                 | 40 (6.1)          | 34 (5.2)              |                 |
| 50–60 (%)                                                | 156 (17.4)        | 8,040 (16.0)             |                 | 132 (20.2)        | 122 (18.7)            |                 |
| 60–70 (%)                                                | 303 (33.8)        | 18,395 (36.7)            |                 | 218 (33.4)        | 226 (34.6)            |                 |
| 70–80 (%)                                                | 298 (33.2)        | 17,555 (35.0)            |                 | 220 (33.7)        | 241 (36.9)            |                 |
| ≥ 80 (%)                                                 | 90 (10.0)         | 3,640 (7.3)              |                 | 36 (5.52)         | 19 (2.9)              |                 |
| <b>Sex, n (%)</b>                                        |                   |                          | 0.3112          |                   |                       | 0.375           |
| Male                                                     | 678 (75.6)        | 37,109 (74.0)            |                 | 489 (75.1)        | 482 (73.9)            |                 |
| Female                                                   | 219 (24.4)        | 13,015 (26.0)            |                 | 163 (24.9)        | 170 (26.1)            |                 |
| <b>Comorbidity, n (%)</b>                                |                   |                          |                 |                   |                       |                 |
| Diabetes                                                 | 350 (39.0)        | 21,708 (43.3)            | 0.011           | 240 (36.8)        | 247 (37.8)            | 0.461           |
| Cardiovascular disease*                                  | 301 (33.6)        | 20,791 (41.5)            | <0.001          | 226 (34.6)        | 234 (35.8)            | 0.125           |
| Chronic lung diseases                                    | 601 (67.0)        | 36,234 (72.3)            | 0.001           | 423 (64.8)        | 434 (66.5)            | 0.798           |
| Chronic kidney diseases                                  | 59 (6.6)          | 2,751 (5.5)              | 0.179           | 38 (5.8)          | 39 (6.6)              | 0.174           |
| Chronic liver diseases                                   | 25 (2.8)          | 1,404 (2.8)              | 1.000           | 13 (1.9)          | 16 (2.4)              | 0.366           |
| Rheumatic diseases                                       | 48 (5.4)          | 3,221 (6.4)              | 0.217           | 32 (4.9)          | 33 (5.0)              | 1.000           |
| <b>Concomitant use of immunosuppressive drugs, n (%)</b> |                   |                          |                 |                   |                       |                 |
| Immunosuppressant                                        | 31 (3.5)          | 2,428 (4.8)              | 0.065           | 18 (2.7)          | 21 (3.3)              | 0.210           |
| Steroid**                                                | 34 (3.8)          | 3,386 (6.8)              | 0.001           | 23 (3.5)          | 24 (3.7)              | 1.000           |
